# Supplementary material for: Tracking slow-moving landslides with PlanetScope data: new perspectives on the satellite’s perspective
Source: Copernicus journal article supplement (doi:10.5194/egusphere-2023-1698), 2023-08-09
Supplement: Supplementary file 1 [file egusphere-2023-1698-supplement.pdf]

## 1 PlanetScope data

The following tables list scene IDs and acquisition parameters of all PlanetScope data used in this study.

**Table S1.** List of PlanetScope L3B scenes and corresponding metadata across the Sigvas landslide acquired within an approx. 1.5 month period. All scenes were correlated with each other to determine which acquisition parameters determine the strength of the orthorectification error seen in the disparity maps. The quality column indicates whether images have passed all image quality metrics in the processing pipeline. The use of quality category "standard" is recommended. We included a few "test" images, particularly for the identification of the orthorectification error signal at the Sigvas site, to keep a short temporal baseline.

| Scene ID                | Date of Acquisition | View Angle | Satellite Azimuth | Quality  |
|-------------------------|---------------------|------------|-------------------|----------|
| 20220707_144112_41_247c | 2022-07-07          | 4.1        | 278.3             | standard |
| 20220712_142347_87_2262 | 2022-07-12          | 5          | 278.6             | standard |
| 20220713_141250_01_2212 | 2022-07-13          | 0.1        | 353.3             | standard |
| 20220716_144128_52_2478 | 2022-07-16          | 5          | 278.8             | standard |
| 20220717_143827_66_2470 | 2022-07-17          | 4          | 96.5              | standard |
| 20220723_143904_82_2478 | 2022-07-23          | 0.1        | 359.4             | standard |
| 20220724_140731_82_245c | 2022-07-24          | 1.1        | 283               | standard |
| 20220731_145317_96_2414 | 2022-07-31          | 3          | 94.3              | test     |
| 20220801_143753_11_2490 | 2022-08-01          | 5          | 96.8              | test     |
| 20220802_143920_28_2480 | 2022-08-02          | 1          | 281.4             | test     |
| 20220803_144118_87_2482 | 2022-08-03          | 5          | 278.8             | test     |
| 20220804_140158_24_2460 | 2022-08-04          | 5          | 96.8              | standard |
| 20220806_145017_17_2424 | 2022-08-06          | 0.6        | 8.3               | test     |
| 20220809_145704_40_2426 | 2022-08-09          | 4          | 279               | test     |
| 20220812_140836_60_241f | 2022-08-12          | 4          | 279.2             | standard |
| 20220814_143747_50_248b | 2022-08-14          | 4          | 96.2              | standard |
| 20220823_145618_97_2407 | 2022-08-23          | 0.1        | 348.9             | standard |

**Table S2.** List of PlanetScope L3B scenes and corresponding metadata used for offset tracking across the Siguas landslide separated by processing groups.

| <b>Group</b>            | <b>Scene ID</b>         | <b>Date of Acquisition</b> | <b>View Angle</b> | <b>Satellite Azimuth</b> | <b>Quality</b> |
|-------------------------|-------------------------|----------------------------|-------------------|--------------------------|----------------|
| 1                       | 20200717_141850_23_2278 | 2020-07-17                 | 3.9               | 279.4                    | standard       |
|                         | 20210302_142459_17_2231 | 2021-03-02                 | 4                 | 278.4                    | standard       |
|                         | 20210901_141429_62_242b | 2021-09-01                 | 4.1               | 279.3                    | standard       |
|                         | 20220108_141431_75_2212 | 2022-01-08                 | 4                 | 279.4                    | standard       |
|                         | 20220220_144136_13_2490 | 2022-02-20                 | 4                 | 279.3                    | standard       |
|                         | 20220707_144112_41_247c | 2022-07-07                 | 4.1               | 278.3                    | standard       |
|                         | 20221221_140616_42_2430 | 2022-12-21                 | 4.5               | 278.6                    | standard       |
| 2                       | 20201122_150654_13_2416 | 2020-11-22                 | 3                 | 96.2                     | test           |
|                         | 20210111_150637_23_2406 | 2021-01-11                 | 3                 | 96.3                     | standard       |
|                         | 20210406_142246_83_2231 | 2021-04-06                 | 3                 | 97.9                     | standard       |
|                         | 20211002_141111_60_2428 | 2021-10-02                 | 3.1               | 95.9                     | standard       |
|                         | 20211208_141111_53_2465 | 2021-12-08                 | 3                 | 96.3                     | standard       |
|                         | 20220413_140614_39_2455 | 2022-04-13                 | 3                 | 95.9                     | standard       |
|                         | 20220629_142321_02_2251 | 2022-06-29                 | 3                 | 95.7                     | standard       |
|                         | 20221215_145536_42_2413 | 2022-12-15                 | 3.3               | 96                       | standard       |
| 20230228_144044_35_2489 | 2023-02-28              | 3.1                        | 94.4              | standard                 |                |
| 3                       | 20200329_141432_68_2271 | 2020-03-29                 | 0.1               | 2                        | standard       |
|                         | 20200926_150927_49_241c | 2020-09-26                 | 0.1               | 355.1                    | test           |
|                         | 20201113_142248_59_2441 | 2020-11-13                 | 0.2               | 3.3                      | standard       |
|                         | 20210307_150627_51_2401 | 2021-03-07                 | 0.2               | 348.7                    | standard       |
|                         | 20210514_141500_24_2458 | 2021-05-14                 | 0.1               | 359.1                    | standard       |
|                         | 20210702_141333_57_2460 | 2021-07-02                 | 0.2               | 345.7                    | standard       |
|                         | 20210921_141221_26_2464 | 2021-09-21                 | 0.3               | 4                        | standard       |
|                         | 20220616_143858_18_2488 | 2022-06-16                 | 0.1               | 2.6                      | standard       |
|                         | 20221020_143849_06_2488 | 2022-10-20                 | 0.4               | 14.8                     | standard       |
| 4                       | 20200926_150927_49_241c | 2020-09-26                 | 0.1               | 355.1                    | test           |
|                         | 20210309_142212_90_222f | 2021-03-09                 | 5                 | 96.5                     | standard       |
|                         | 20210705_141517_63_241a | 2021-07-05                 | 5                 | 279                      | standard       |
|                         | 20220506_140845_16_2439 | 2022-05-06                 | 1                 | 91.9                     | standard       |
|                         | 20221002_143906_84_2495 | 2022-10-02                 | 2                 | 95.2                     | standard       |
|                         | 20221206_143747_18_2488 | 2022-12-06                 | 4.9               | 96.6                     | standard       |
|                         | 20230106_140514_50_2429 | 2023-01-06                 | 1.2               | 281.3                    | standard       |
| 20230305_144147_03_24a5 | 2023-03-05              | 3.8                        | 279.1             | standard                 |                |

**Table S3.** List of PlanetScope L3B scenes and corresponding metadata used for offset tracking across the Del Medio landslide separated by processing groups.

| Group                   | Scene ID                | Date of Acquisition | View Angle | Satellite Azimuth | Quality  |
|-------------------------|-------------------------|---------------------|------------|-------------------|----------|
| 1                       | 20200516_134707_21_2277 | 2020-05-16          | 5          | 279.8             | standard |
|                         | 20200729_134905_10_2277 | 2020-07-29          | 5          | 279.6             | standard |
|                         | 20200905_134846_16_222b | 2020-09-05          | 4.9        | 279.5             | standard |
|                         | 20201005_135131_66_2277 | 2020-10-05          | 5          | 279.5             | standard |
|                         | 20210316_134737_82_241e | 2021-03-16          | 5.1        | 279.8             | standard |
|                         | 20210531_134614_85_241e | 2021-05-31          | 5          | 279.6             | standard |
|                         | 20220505_133805_86_242b | 2022-05-05          | 5          | 279.3             | standard |
|                         | 20220619_141044_55_24a4 | 2022-06-19          | 5          | 279.5             | standard |
|                         | 20220827_142307_95_2274 | 2022-08-27          | 5          | 279.5             | standard |
|                         | 20230220_132456_32_2445 | 2023-02-20          | 5.1        | 279.3             | standard |
| 2                       | 20210603_134145_29_2456 | 2021-06-03          | 4          | 96.3              | standard |
|                         | 20210710_134242_08_2465 | 2021-07-10          | 4          | 96.2              | standard |
|                         | 20210926_142938_21_2274 | 2021-09-26          | 4          | 95.1              | standard |
|                         | 20220602_135219_78_2251 | 2022-06-02          | 4          | 96.4              | standard |
|                         | 20220915_141739_37_227b | 2022-09-15          | 4          | 96.5              | standard |
|                         | 20221227_140803_96_247d | 2022-12-27          | 4.3        | 96.3              | standard |
|                         | 20230428_141134_83_2481 | 2023-04-28          | 4.4        | 96.8              | standard |
| 3                       | 20200328_134314_64_2263 | 2020-03-28          | 0.1        | 326.7             | standard |
|                         | 20200909_143842_94_227a | 2020-09-09          | 0.1        | 4.6               | standard |
|                         | 20210420_134520_10_242d | 2021-04-20          | 0          | 2.8               | standard |
|                         | 20210815_143231_23_2426 | 2021-08-15          | 0.1        | 5                 | standard |
|                         | 20211127_133936_00_2455 | 2021-11-27          | 0.1        | 358               | test     |
|                         | 20220323_140918_59_2485 | 2022-03-23          | 0.1        | 10.2              | standard |
|                         | 20220823_133629_45_2465 | 2022-08-23          | 0.1        | 0.5               | standard |
|                         | 20221101_140857_70_2490 | 2022-11-01          | 0.1        | 355.7             | standard |
| 20230425_141309_40_247b | 2023-04-25              | 0                   | 359.2      | standard          |          |
| 4                       | 20200909_143842_94_227a | 2020-09-09          | 0.1        | 4.6               | standard |
|                         | 20201114_135258_85_2251 | 2020-11-14          | 3.1        | 280.5             | standard |
|                         | 20210516_134349_86_2235 | 2021-05-16          | 5          | 96.6              | standard |
|                         | 20210710_134242_08_2465 | 2021-07-10          | 4          | 96.2              | standard |
|                         | 20211002_133911_53_2435 | 2021-10-02          | 5          | 96.7              | standard |
|                         | 20220506_140832_67_249d | 2022-05-06          | 2          | 94.4              | standard |
|                         | 20220610_133641_11_2429 | 2022-06-10          | 2.1        | 94.4              | standard |
|                         | 20220904_135644_53_2276 | 2022-09-04          | 4.7        | 279.4             | standard |
| 20230511_133814_07_242d | 2023-05-11              | 1.4                 | 285        | standard          |          |

**Table S4.** List of PlanetScope L1B scenes and corresponding metadata used for DEM generation at the Siguas and Del Medio landslide.

| <b>Site</b> | <b>Scene ID</b>         | <b>Date of Acquisition</b> | <b>View Angle</b> | <b>Satellite Azimuth</b> | <b>Quality</b> |
|-------------|-------------------------|----------------------------|-------------------|--------------------------|----------------|
| Siguas      | 20220702_145351_89_240c | 2022-07-02                 | 5.1               | 96.6                     | standard       |
|             | 20220706_144107_59_24a3 | 2022-07-06                 | 5.1               | 278.7                    | standard       |
| Del Medio   | 20220907_140709_64_24a3 | 2022-09-07                 | 5                 | 96.9                     | standard       |
|             | 20220912_141056_91_2486 | 2022-09-12                 | 5                 | 279.4                    | standard       |



## 2 Supplementary figures

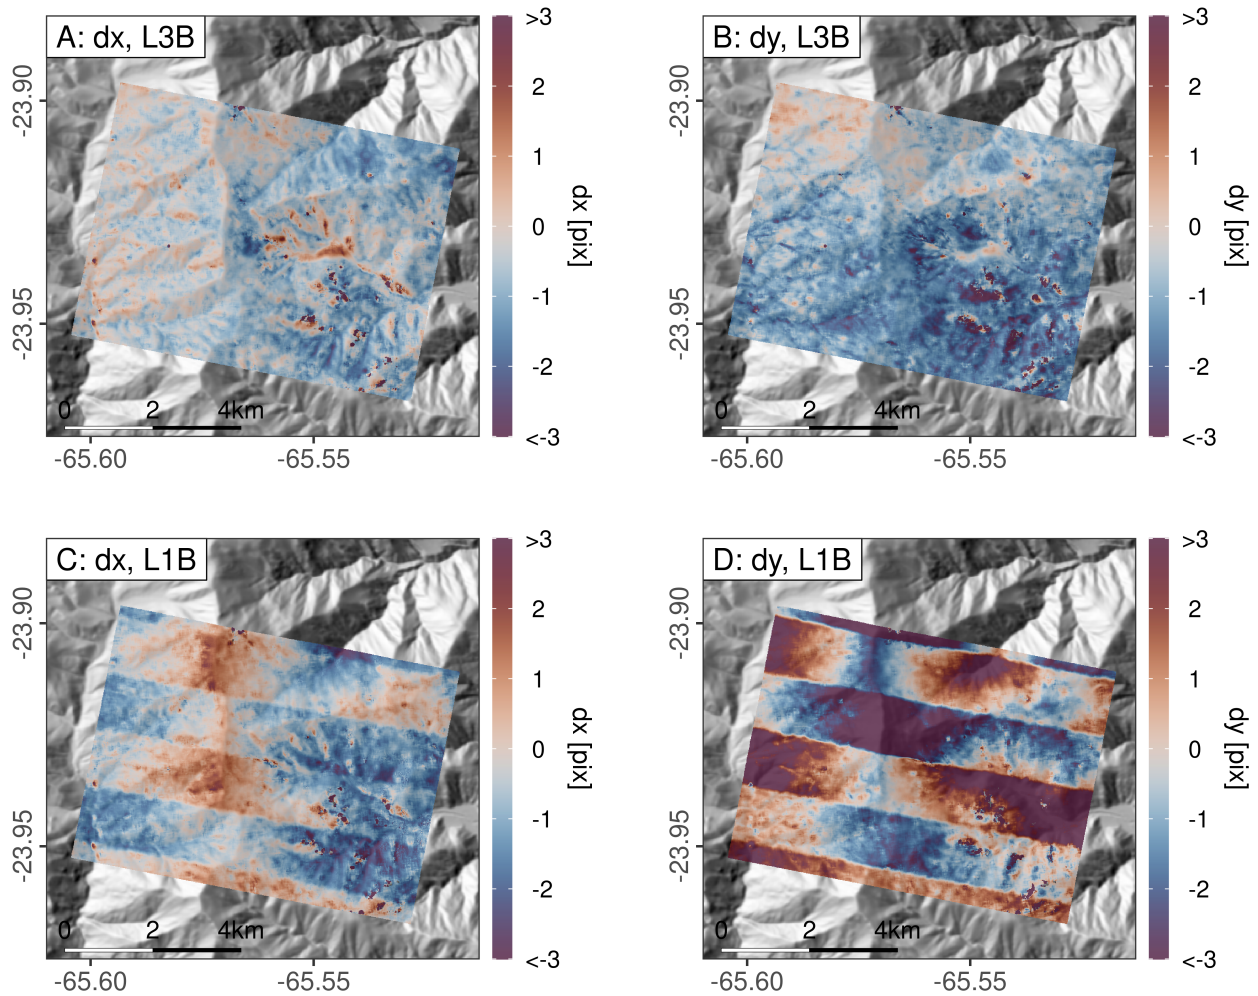

**Figure S1.** Misalignment of sub-frames composing a full PSB.SD scene can cause stripe artifacts in the obtained disparity maps. Particularly older PSB.SD acquisitions (early 2020) are affected. However, Planet seems to have improved the alignment process for newer acquisitions and the L3B data. This Figure shows disparity maps (EW and NS direction) obtained from two PlanetScope scenes acquired on 28.03.2020 and 14.11.2020. In the L3B data, the stripes have disappeared, while the L1B data, which was manually orthorectified using a DEM derived from PlanetScope data, still show severe artifacts.

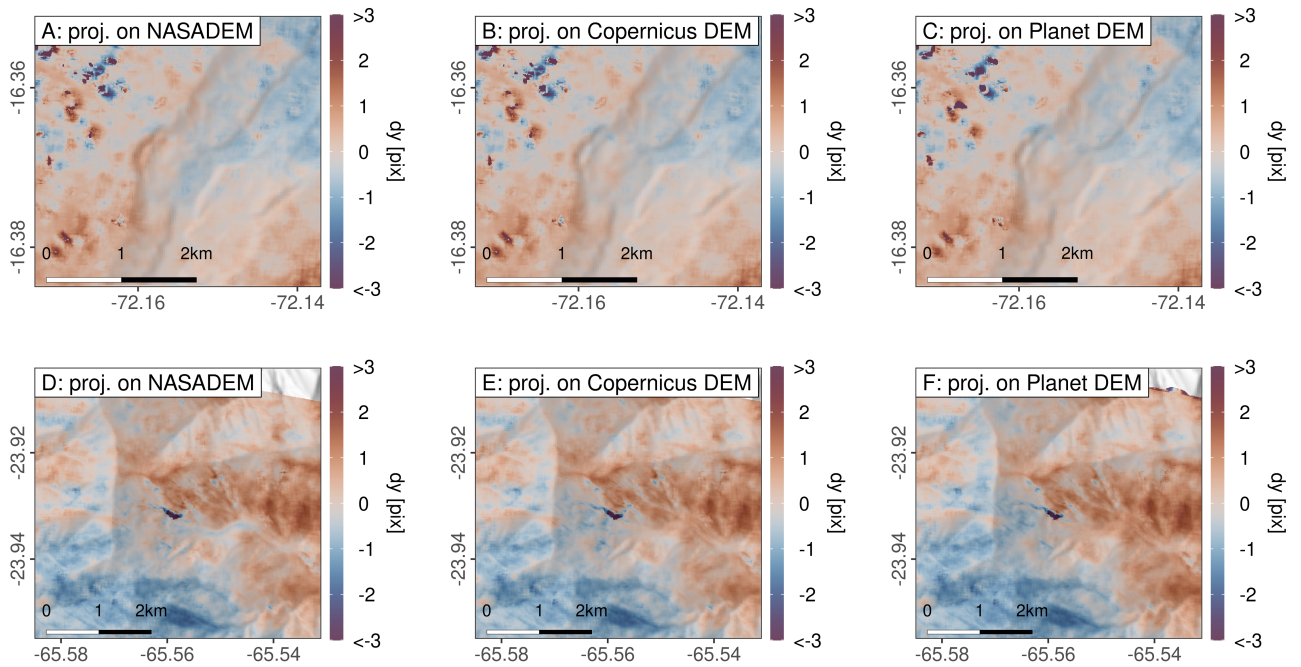

**Figure S2.** Displacement in NS direction estimated across the Siguas (A-C) and Del Medio landslides (D-F) with PlanetScope L1B scenes orthorectified using the NASADEM (A, D), the Copernicus DEM (B, E), and a DEM generated from PlanetScope L1B scenes (C, F). Disparity maps were generated from scene pairs with a minimal temporal baseline (10 days: 07.07.2022 to 17.07.2022) for A-C and 16 days (08.09.2022 to 24.09.2022) for D-F, so the surface can be assumed to be stable. Outdated DEM heights in the reference DEMs produce lateral offset signals in the disparity maps which are, however, less visible in the along-track components.

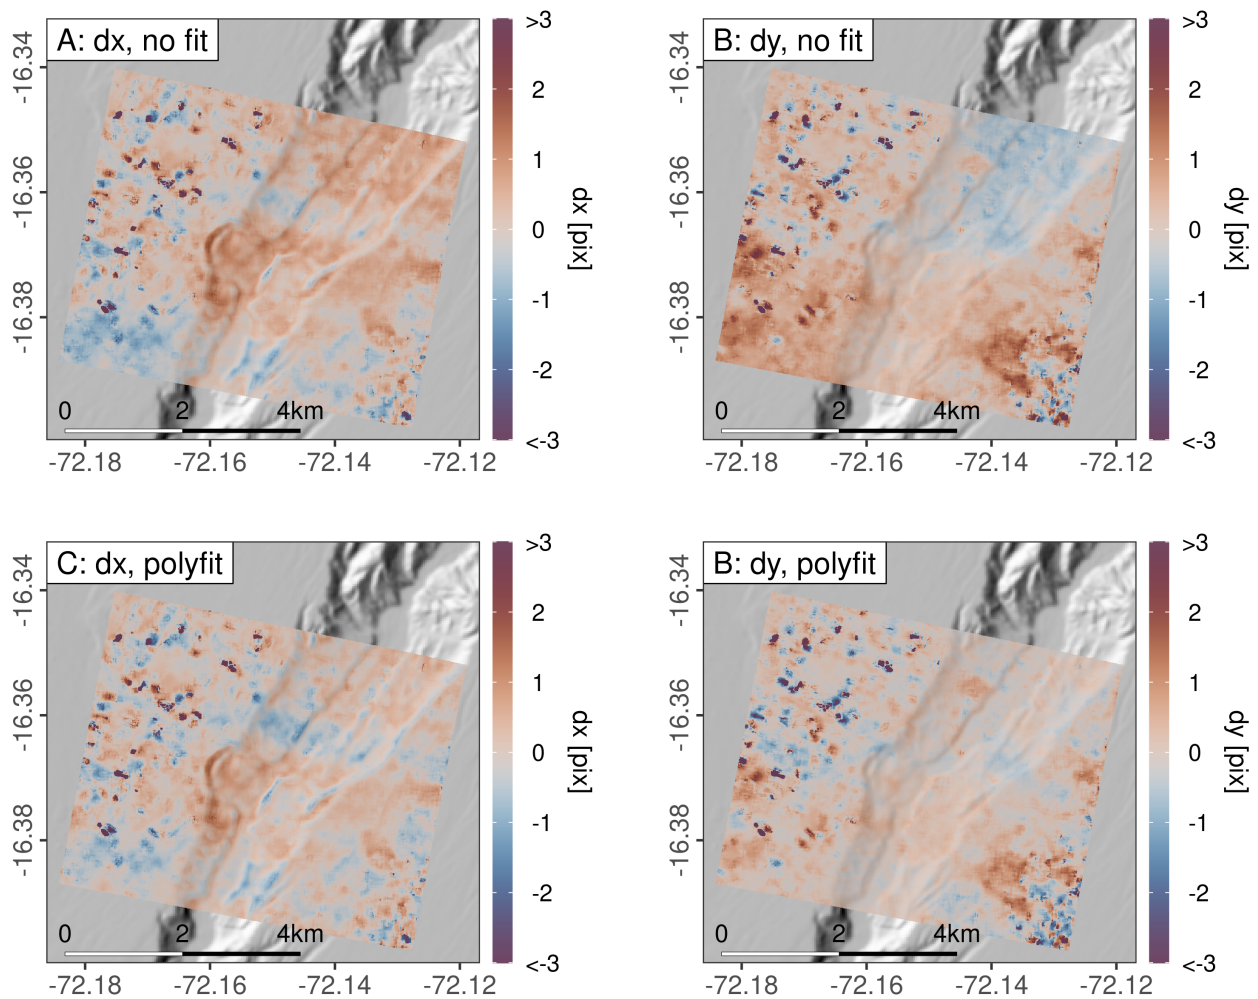

**Figure S3.** Disparity maps estimated across the Siguas landslide based on an L1B scene pair from 07.07.2022 and 17.07.2022 which was projected onto a DEM generated from PlanetScope data. The uncorrected disparity maps (A, B) still show a ramp error which can be efficiently removed by approximating the derived disparity through a polynomial fit. Subtracting this fit results in zero-centered offset maps, which is the expected result for images acquired close in time.



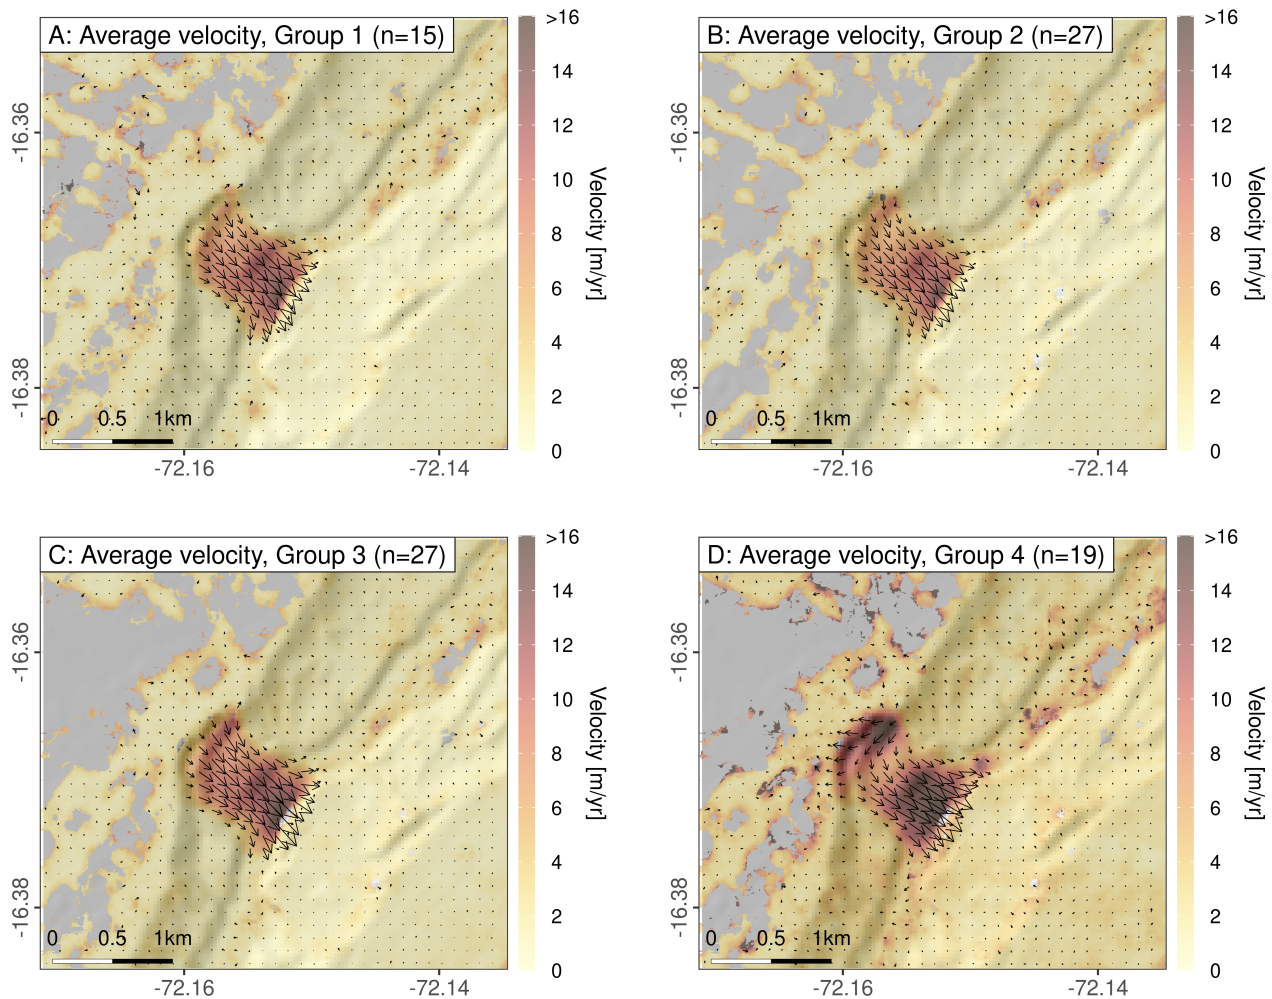

**Figure S4.** Vector plot indicating magnitude and direction of surface displacement estimated across the Sigüas landslide averaged within individual groups sharing a common view angle and satellite azimuth (A-C). Erroneous matches related to changing land cover in the agricultural area towards the northwest of the scene were removed by masking pixels with high standard deviations of velocity. If correlation pairs are not carefully but randomly selected (D), orthorectification errors will propagate to the disparity maps, suggesting elevated velocities and erroneous motion trajectories in areas where elevation changes have occurred. For the average velocity field of group 4, we apply the variance mask from group 3 (C) to mask agricultural areas, as the varying orthorectification error also results high velocity variations across the landslide. All disparity maps used to calculate velocities were optimized using a polynomial fit as described in the main manuscript.

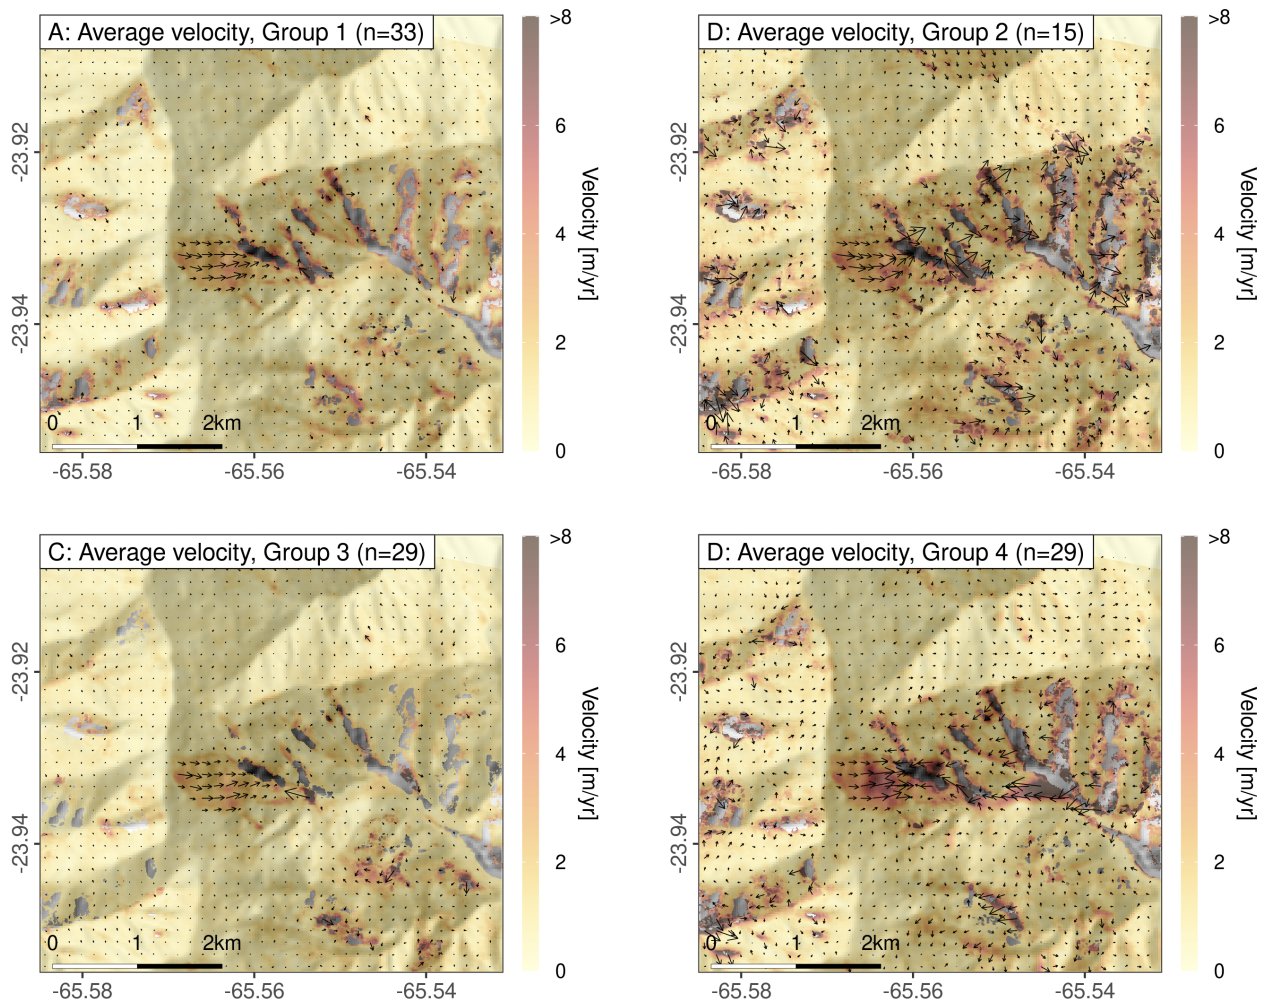

**Figure S5.** Vector plot indicating magnitude and direction of surface displacement estimated across the Del Medio landslide averaged within individual groups sharing a common view angle and satellite azimuth (A-C). Erroneous matches related to variable shading along steep cliffs and deeply incised channels were removed by masking pixels with high standard deviations of velocity. If correlation pairs are not carefully but randomly selected (D), orthorectification errors will propagate to the disparity maps, suggesting elevated velocities and erroneous motion trajectories in areas where elevation changes have occurred. For the average velocity field of group 4, we apply the variance mask from group 3 (C) to mask shadowed areas, as the varying orthorectification error also results high velocity variations across the landslide. All disparity maps used to calculate velocities were optimized using a polynomial fit as described in the main manuscript.

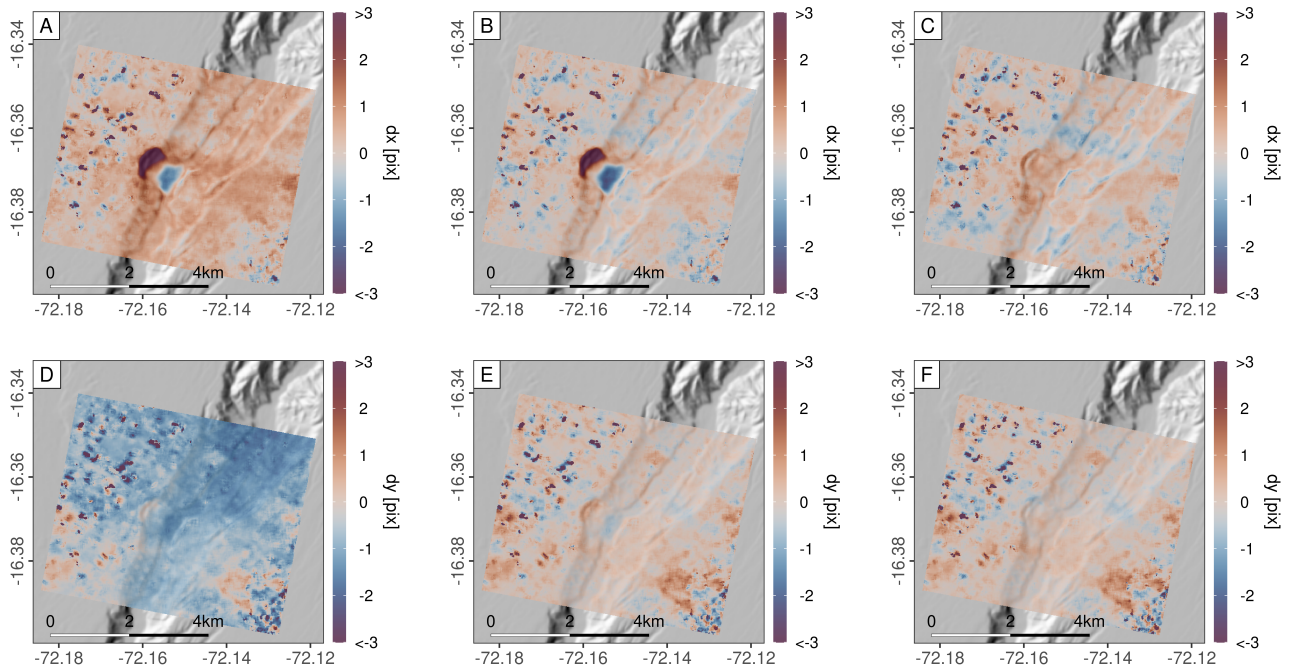

**Figure S6.** Map view of disparity maps in EW ( $dx$ ) and NS ( $dy$ ) directions at the Sigüas landslide derived from two PlanetScope scenes acquired on the 07.07.2022 and 17.07.2022, corresponding to the histograms shown in Figure 14 in the main manuscript. We compare results obtained from Level 3B scenes as downloaded from the Planet Explorer (A, D), after applying a polynomial fit to correct for margin and stereoscopic effects (B, E), and displacement derived from orthorectified L1B scenes using a DEM generated from PlanetScope data, with remaining distortions corrected using a polynomial fit (C, F). Through the correction steps proposed in this study, the coregistration accuracy between two PlanetScope scenes can be lowered to the sub-pixel range over stable terrain, which improves the differentiation of slow landslide motions from noise. Through projecting raw L1B data onto a DEM that more closely aligns with the observed topography, orthorectification errors in the area of the landslide can be significantly reduced.



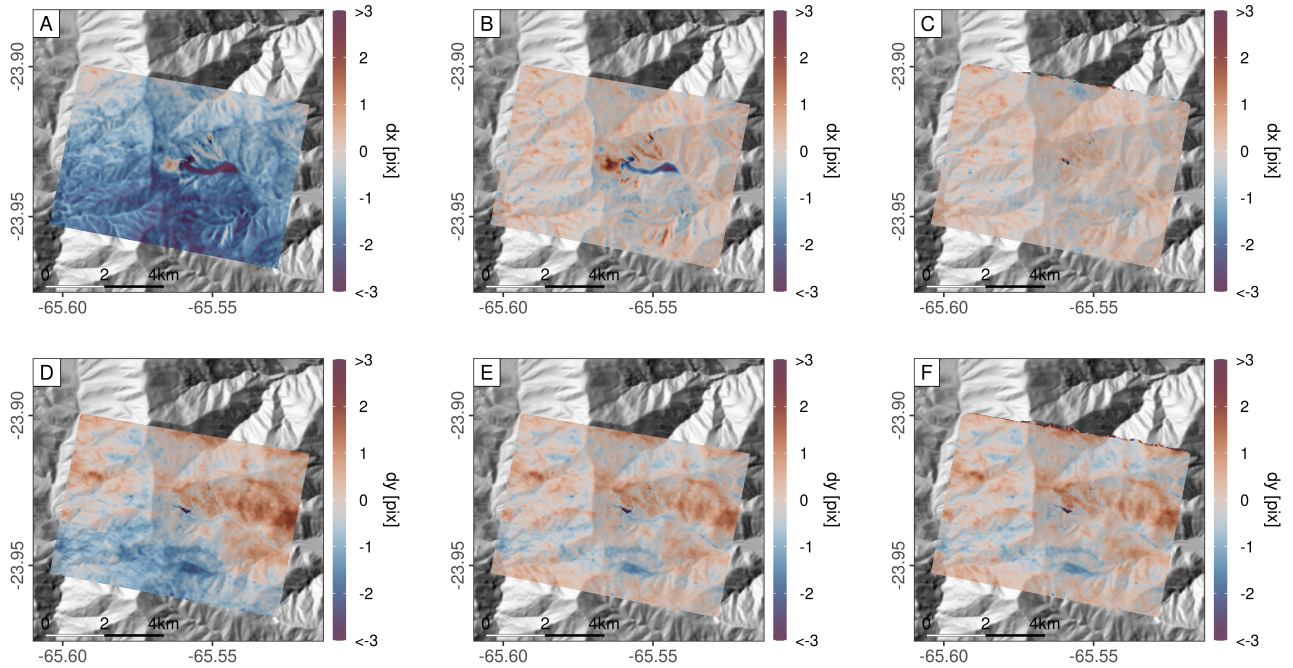

**Figure S7.** Map view of disparity maps in EW ( $dx$ ) and NS ( $dy$ ) directions at the Del Medio landslide derived from two PlanetScope scenes acquired on the 08.09.2022 and 24.09.2022, corresponding to the histograms shown in Figure 14 in the main manuscript. We compare results obtained from Level 3B scenes as downloaded from the Planet Explorer (A, D), after applying a polynomial fit to correct for margin and stereoscopic effects (B, E), and displacement derived from orthorectified LIB scenes using a DEM generated from PlanetScope data, with remaining distortions corrected using a polynomial fit (C, F). Through the correction steps proposed in this study, the coregistration accuracy between two PlanetScope scenes can be lowered to the sub-pixel range over stable terrain, which improves the differentiation of slow landslide motions from noise. Through projecting raw LIB data onto a DEM that more closely aligns with the observed topography, orthorectification errors in the area of the landslide can be significantly reduced.

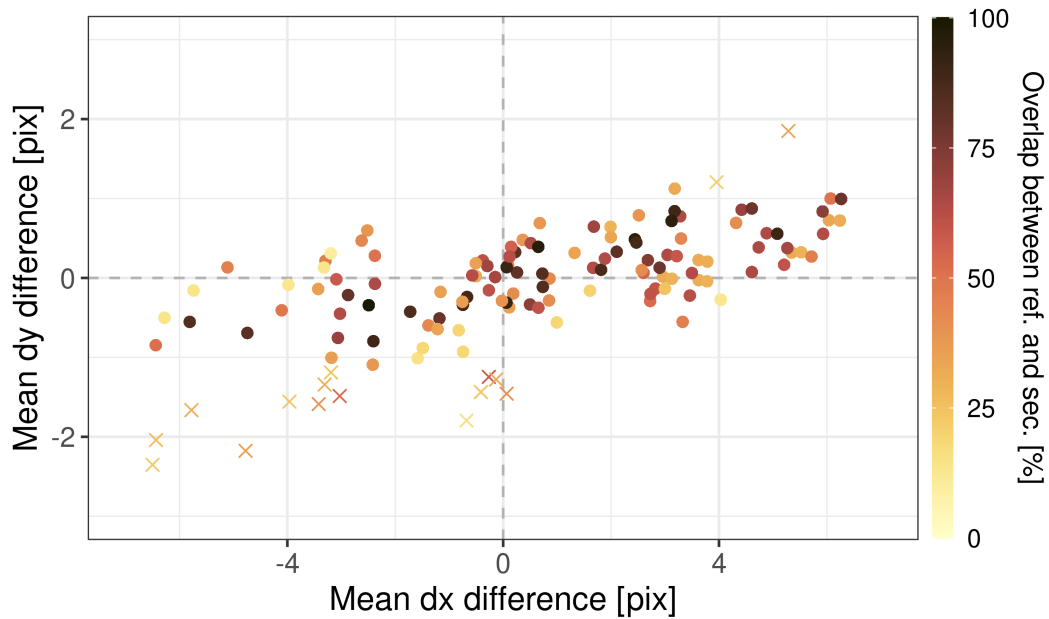

**Figure S8.** Difference of mean displacement in EW (dx) and NS (dy) directions between source and deposition area of the Sigvas landslide derived from 136 correlation pairs of L3B scenes between July 7 and August 23, 2022. Colors represent overlap between reference and secondary scene in percent. We find no relationship between those two parameters, indicating that the local incidence angle within a scene is negligible for predicting the orthorectification error.

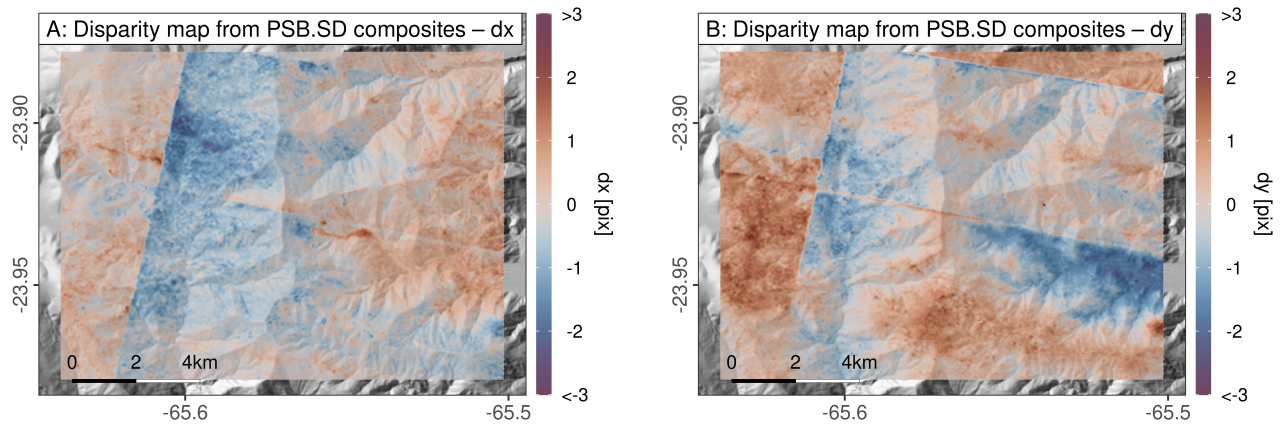

**Figure S9.** Disparity maps in EW and NS direction obtained from two PlanetScope data composites downloaded from the Planet Explorer. The estimated offset clearly reflects the margins of the composited scenes with sudden jumps of approx. 2 pixels. Given these severe artifacts, we recommend to manually improve the stitching process if slow motions across larger study areas are targeted.
